# Supplementary material for: Identification of key lipid metabolites during metabolic dysregulation in the diabetic retinopathy disease mouse model and efficacy of Keluoxin capsule using an UHPLC-MS-based non-targeted lipidomics approach
Source: PubMed Central journal article supplement — RSC Adv. 2021 Feb 1;11(10):5491–505. doi: 10.1039/d0ra00343c (PMC8694764; doi:10.1039/d0ra00343c), 2021-02-01
Supplement: RA-011-D0RA00343C-s001.pdf [file RA-011-D0RA00343C-s001.pdf]

Figure S1. Chromatogram for the determination of astragaloside IV in KLX samples by HPLC-ELSD. A: Chromatogram of astragaloside IV standard injection 10 $\mu$ l. B: Chromatogram of astragaloside IV standard injection 20 $\mu$ l. C: Chromatograms of two parallel KLX samples, each sample was measured twice, injected 20  $\mu$ L.

Figure S2. Histopathological results of retinal ganglion cells in the control group, model group, and the KLX intervention group. A: In the control group, the ganglion cells were arranged in a single row to form the innermost layer of the retina. The nucleus was uniform, the organelle structure was clear, and the shape, size and structure of the mitochondrion were normal. (x12000). B: In the model group, the number of mitochondria was significant decreased, and a large number of mitochondria appeared swelling and vacuole degeneration. The number of organelles such as nucleus pyknosis, a large number of vacuoles, polyribosomes, and rough endoplasmic reticulum in the cytoplasm were significantly reduced. (x12000). C: In KLX intervention group, the number of mitochondria seen in the ganglion cells was relatively higher than that of the model group. A few mitochondria were swelling and vacuole degeneration. The number of organelles also increased, the structure became clearer, and the morphology gradually returned to normal. (x12000).

Figure S1.

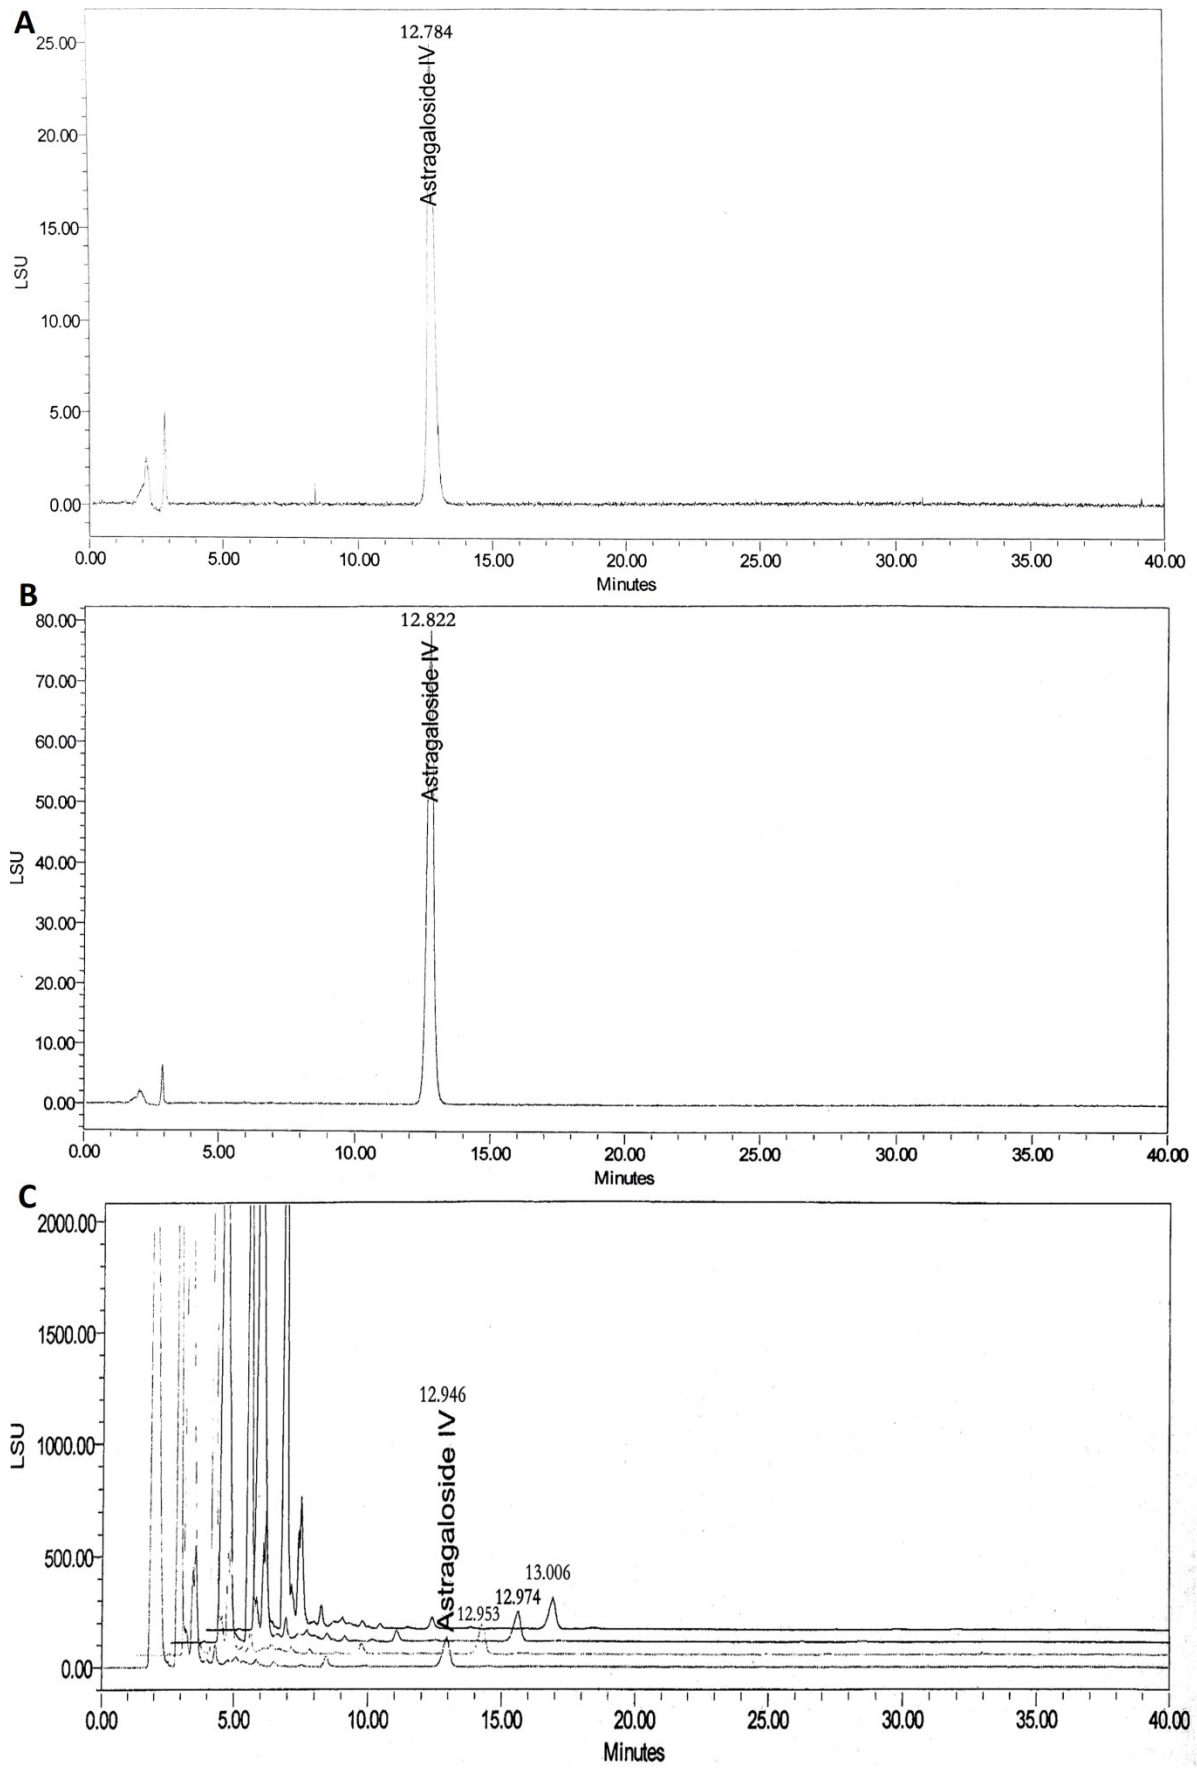

Figure S2.

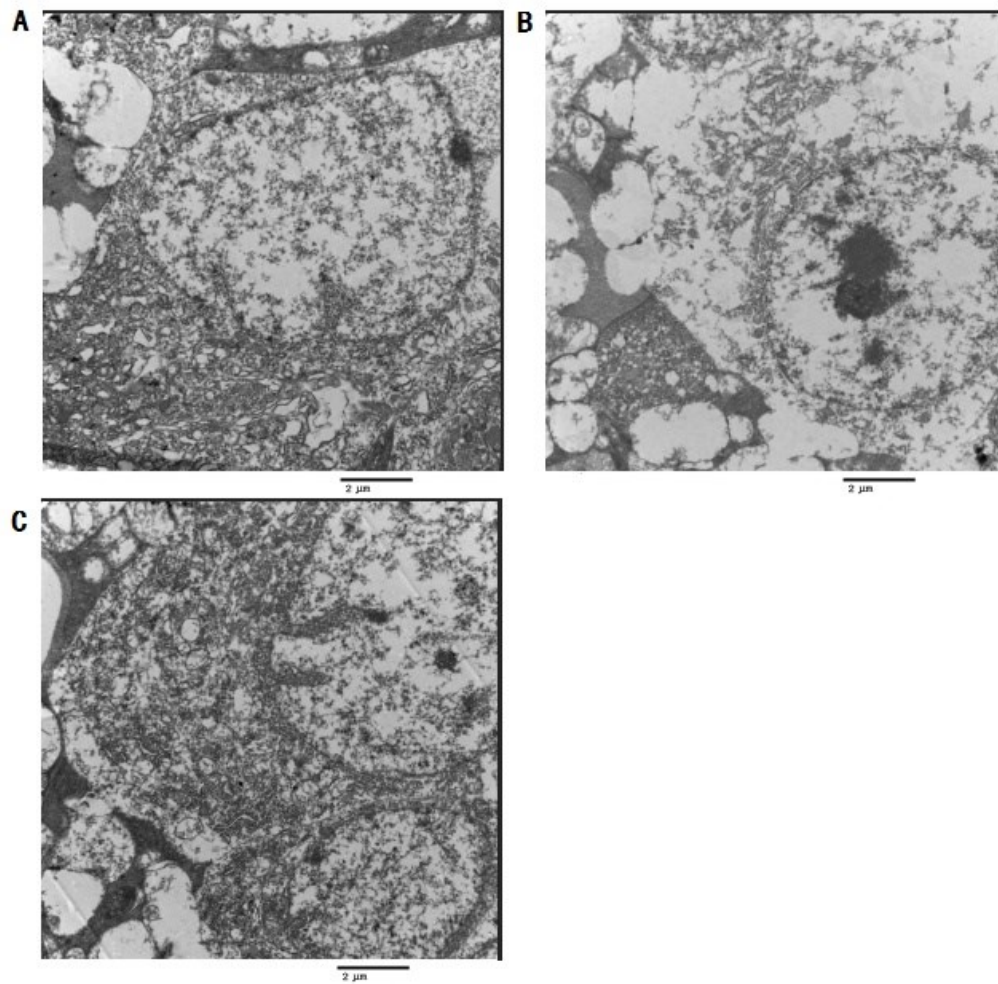

**Table S1.**The specific content information of astragaloside IV in the KLX sample.

|               | Number | Precision weighing        | Concentration (mg/ml) | Injection ( $\mu$ l) | Peak area (A) | Astragaloside IV Content (%) |
|---------------|--------|---------------------------|-----------------------|----------------------|---------------|------------------------------|
| Astragaloside | 1--1   | $4.9752 \times 10^{-3}$ g | 0.2487                | 10                   | 433365        | -                            |
| IV standard   | 1--2   | $4.9752 \times 10^{-3}$ g | 0.2487                | 20                   | 1290019       | -                            |
| KLX           | 1--1   | 3.0015g                   | 0.3644                | 20                   | 2352654       | 0.1314                       |
|               | 1--2   | 3.0015g                   | 0.3668                | 20                   | 2376746       | 0.1323                       |
|               | 2--1   | 3.0028g                   | 0.3776                | 20                   | 2488664       | 0.1361                       |
|               | 2--2   | 3.0028g                   | 0.3910                | 20                   | 2524028       | 0.1374                       |

(Standard: The KLX sample contains astragali radix (*Astragalusmembranaceus* (Fisch.) based on astragaloside IV ( $C_{41}H_{68}O_{14}$ ), which should not be less than 0.061%.)

**Table S2.** Detailed identification information of serum lipid biomarkers of DR detected by UHPLC-Q-TOF/MS (IDA) in positive and negative ion mode.

| NO. | Metabolite name                     | Retention time (min) | m/z      | Scan mode | Formula                                                         | Compound ID  | HMDB        | KEGG   | Change trend | Statistical significance |
|-----|-------------------------------------|----------------------|----------|-----------|-----------------------------------------------------------------|--------------|-------------|--------|--------------|--------------------------|
| 1   | SM(d18:1/22:0)                      | 4.53                 | 787.6690 | ESI+      | C <sub>45</sub> H <sub>91</sub> N <sub>2</sub> O <sub>6</sub> P | LMSP03010006 | HMDB0012103 | C00550 | ▼            | **                       |
| 2   | Sphinganine 1-phosphate             | 6.28                 | 382.2718 | ESI+      | C <sub>18</sub> H <sub>40</sub> NO <sub>5</sub> P               | LMSP01050002 | HMDB0001383 | C01120 | ▲            | **                       |
| 3   | LysoPC(18:3(6Z,9Z,12Z))             | 6.31                 | 518.3245 | ESI+      | C <sub>26</sub> H <sub>48</sub> NO <sub>7</sub> P               | LMGP01050128 | HMDB0010387 | C04230 | ▼            | **                       |
| 4   | LysoPC(22:6(4Z,7Z,10Z,13Z,16Z,19Z)) | 6.76                 | 568.3408 | ESI+      | C <sub>30</sub> H <sub>50</sub> NO <sub>7</sub> P               | LMGP01050056 | HMDB0010404 | C04230 | ▲            | *                        |
| 5   | LysoPC(20:3(8Z,11Z,14Z))            | 7.28                 | 546.3566 | ESI+      | C <sub>28</sub> H <sub>52</sub> NO <sub>7</sub> P               | LMGP01050133 | HMDB0010394 | C04230 | ▲            | **                       |
| 6   | LysoPC(18:1(9Z))                    | 7.65                 | 522.3568 | ESI+      | C <sub>26</sub> H <sub>52</sub> NO <sub>7</sub> P               | LMGP01050032 | HMDB0002815 | C04230 | ▲            | **                       |
| 7   | LysoPC(P-18:1(9Z))                  | 8.68                 | 506.3624 | ESI+      | C <sub>26</sub> H <sub>52</sub> NO <sub>6</sub> P               | LMGP01070012 | HMDB0010408 | C04230 | ▲            | **                       |
| 8   | LysoPC(18:0)                        | 8.71                 | 546.3535 | ESI+      | C <sub>26</sub> H <sub>54</sub> NO <sub>7</sub> P               | LMGP01050026 | HMDB0010384 | C04230 | ▲            | **                       |
| 9   | Docosahexaenoic acid                | 9.38                 | 329.2484 | ESI+      | C <sub>22</sub> H <sub>32</sub> O <sub>2</sub>                  | LMFA01030185 | HMDB0002183 | C06429 | ▲            | **                       |
| 10  | Arachidonic acid                    | 9.58                 | 305.2483 | ESI+      | C <sub>20</sub> H <sub>32</sub> O <sub>2</sub>                  | LMFA01030001 | HMDB0001043 | C00219 | ▲            | **                       |
| 11  | Prostaglandin D <sub>2</sub>        | 3.93                 | 351.2164 | ESI-      | C <sub>20</sub> H <sub>32</sub> O <sub>5</sub>                  | LMFA03010004 | HMDB0001403 | C00696 | ▲            | **                       |
| 12  | Cortisol                            | 4.10                 | 361.2005 | ESI-      | C <sub>21</sub> H <sub>30</sub> O <sub>5</sub>                  | LMST02030001 | HMDB0000063 | C00735 | ▲            | **                       |
| 13  | Cortisone                           | 4.28                 | 359.1849 | ESI-      | C <sub>21</sub> H <sub>28</sub> O <sub>5</sub>                  | LMST02030090 | HMDB0002802 | C00762 | ▲            | **                       |
| 14  | 15(S)-HETE                          | 4.29                 | 365.2321 | ESI-      | C <sub>20</sub> H <sub>32</sub> O <sub>3</sub>                  | LMFA03060001 | HMDB0003876 | C04742 | ▲            | **                       |
| 15  | Thromboxane A <sub>2</sub>          | 4.33                 | 351.2163 | ESI-      | C <sub>20</sub> H <sub>32</sub> O <sub>5</sub>                  | LMFA03030001 | HMDB0001452 | C02198 | ▲            | **                       |
| 16  | Dihydrocortisol                     | 4.40                 | 363.2162 | ESI-      | C <sub>21</sub> H <sub>32</sub> O <sub>5</sub>                  | LMST02030204 | HMDB0003259 | C05471 | ▲            | **                       |
| 17  | Androstenedione                     | 4.49                 | 331.1904 | ESI-      | C <sub>19</sub> H <sub>26</sub> O <sub>2</sub>                  | LMST02020007 | HMDB0000053 | C00280 | ▲            | **                       |
| 18  | Dehydroepiandrosterone              | 4.66                 | 333.2058 | ESI-      | C <sub>19</sub> H <sub>28</sub> O <sub>2</sub>                  | LMST02020021 | HMDB0000077 | C01227 | ▲            | **                       |
| 19  | Prostaglandin A <sub>2</sub>        | 4.79                 | 333.2061 | ESI-      | C <sub>20</sub> H <sub>30</sub> O <sub>4</sub>                  | LMFA03010035 | HMDB0002752 | C05953 | ▲            | **                       |
| 20  | Leukotriene B <sub>4</sub>          | 4.89                 | 335.2216 | ESI-      | C <sub>20</sub> H <sub>32</sub> O <sub>4</sub>                  | LMFA03020001 | HMDB0001085 | C02165 | ▲            | **                       |

|    |                                 |      |           |      |                                                                 |              |             |        |   |    |
|----|---------------------------------|------|-----------|------|-----------------------------------------------------------------|--------------|-------------|--------|---|----|
| 21 | 14,15-DiHETrE                   | 5.03 | 337.2376  | ESI- | C <sub>20</sub> H <sub>34</sub> O <sub>4</sub>                  | LMFA03050010 | HMDB0002265 | C14775 | ▲ | ** |
| 22 | Testosterone                    | 5.06 | 333.2061  | ESI- | C <sub>19</sub> H <sub>28</sub> O <sub>2</sub>                  | LMST02020002 | HMDB0000234 | C00535 | ▲ | ** |
| 23 | 9,10-DHOME                      | 5.71 | 313.2377  | ESI- | C <sub>18</sub> H <sub>34</sub> O <sub>4</sub>                  | LMFA02000229 | HMDB0004704 | C14828 | ▼ | ** |
| 24 | 15-KETE                         | 5.80 | 317.2114  | ESI- | C <sub>20</sub> H <sub>30</sub> O <sub>3</sub>                  | LMFA03060051 | HMDB0010210 | C04577 | ▲ | ** |
| 25 | Leukotriene A <sub>4</sub>      | 7.56 | 317.2113  | ESI- | C <sub>20</sub> H <sub>30</sub> O <sub>3</sub>                  | LMFA03020023 | HMDB0001337 | C00909 | ▼ | ** |
| 26 | Oleic acid                      | 7.98 | 327.2534  | ESI- | C <sub>18</sub> H <sub>34</sub> O <sub>2</sub>                  | LMFA01030002 | HMDB0000207 | C00712 | ▼ | ** |
| 27 | LysoPA(16:0/0:0)                | 8.57 | 409.2341  | ESI- | C <sub>19</sub> H <sub>39</sub> O <sub>7</sub> P                | LMGP10050006 | HMDB0007853 | C00416 | ▼ | ** |
| 28 | Ganglioside GA2<br>(d18:1/18:0) | 8.67 | 1091.7175 | ESI- | C <sub>56</sub> H <sub>104</sub> N <sub>2</sub> O <sub>18</sub> | LMSP0503AA02 | HMDB0004891 | C06135 | ▲ | *  |
| 29 | Eicosapentaenoic acid           | 8.91 | 301.2169  | ESI- | C <sub>20</sub> H <sub>30</sub> O <sub>2</sub>                  | LMFA01030759 | HMDB0001999 | C06428 | ▲ | ** |
| 30 | γ-Linolenic acid                | 9.13 | 277.2173  | ESI- | C <sub>18</sub> H <sub>30</sub> O <sub>2</sub>                  | LMFA01030141 | HMDB0003073 | C06426 | ▼ | ** |

(Note: “▲” indicated an increased intensity of potential biomarkers in the model group, and “▼” indicated a decreased intensity of potential biomarkers in the model group. □ Represented significant difference (p < 0.05). □□ Represented very significant difference (p < 0.01).)
